# Supplementary material for: GAS5 Regulates RECK Expression and Inhibits Invasion Potential of HCC Cells by Sponging miR-135b
Source: Hindawi journal article supplement (doi:10.1155/2019/2973289), 2019-01-13
Supplement: f1 [file 2973289.f1.pdf]

**Supplementary Table I. The clinicopathological characteristics of the donor patients in this study.**

| No. | Gender | Age | Tumor Size (cm) | Tumor Number | Tumor differentiation | HBV Infection | GAS5 $\Delta\Delta Ct$ | miR-135b $\Delta\Delta Ct$ |
|-----|--------|-----|-----------------|--------------|-----------------------|---------------|------------------------|----------------------------|
| 1   | Female | 53  | $\geq 5$        | Singular     | Well                  | No            | 0.237                  | 2.333                      |
| 2   | Male   | 27  | $\geq 5$        | Multiple     | Poor                  | Yes           | -2.255                 | 1.756                      |
| 3   | Female | 57  | $\geq 5$        | Singular     | Moderate              | Yes           | -0.752                 | 0.825                      |
| 4   | Male   | 44  | $< 5$           | Singular     | Poor                  | Yes           | 1.292                  | -2.257                     |
| 5   | Male   | 50  | $< 5$           | Multiple     | Poor                  | No            | -0.35                  | 1.825                      |
| 6   | Male   | 52  | $\geq 5$        | Singular     | Moderate              | No            | -2.208                 | -0.449                     |
| 7   | Male   | 61  | $\geq 5$        | Multiple     | Well                  | Yes           | 1.795                  | 1.253                      |
| 8   | Female | 39  | $\geq 5$        | Singular     | Poor                  | No            | 0.432                  | -2.42                      |
| 9   | Male   | 46  | $\geq 5$        | Singular     | Poor                  | No            | -5.556                 | 1.796                      |
| 10  | Female | 55  | $< 5$           | Singular     | Well                  | Yes           | -0.209                 | -1.354                     |
| 11  | Male   | 52  | $\geq 5$        | Multiple     | Poor                  | No            | -3.617                 | -0.252                     |
| 12  | Female | 68  | $\geq 5$        | Singular     | Moderate              | Yes           | 0.445                  | 1.834                      |
| 13  | Male   | 61  | $< 5$           | Singular     | Poor                  | No            | 1.076                  | -1.02                      |
| 14  | Male   | 67  | $\geq 5$        | Multiple     | Moderate              | Yes           | -4.32                  | 3.894                      |
| 15  | Male   | 40  | $< 5$           | Singular     | Poor                  | Yes           | -2.54                  | 2.08                       |
| 16  | Female | 59  | $< 5$           | Singular     | Poor                  | Yes           | 0.508                  | -0.343                     |
| 17  | Male   | 45  | $\geq 5$        | Singular     | Moderate              | No            | 2.473                  | -1.19                      |
| 18  | Female | 67  | $\geq 5$        | Multiple     | Well                  | Yes           | -1.19                  | 2.825                      |
| 19  | Male   | 40  | $< 5$           | Singular     | Moderate              | No            | -1.23                  | 1.976                      |
| 20  | Male   | 62  | $< 5$           | Multiple     | Poor                  | No            | -0.996                 | 1.13                       |
| 21  | Female | 58  | $\geq 5$        | Singular     | Moderate              | Yes           | -2.356                 | 1.057                      |
| 22  | Male   | 66  | $\geq 5$        | Singular     | Poor                  | No            | -4.29                  | 3.085                      |
| 23  | Female | 48  | $< 5$           | Multiple     | Poor                  | Yes           | 0.355                  | -1.25                      |
| 24  | Male   | 49  | $\geq 5$        | Multiple     | Well                  | Yes           | 2.152                  | -0.927                     |
| 25  | Male   | 68  | $\geq 5$        | Singular     | Well                  | Yes           | 1.17                   | -2.333                     |
| 26  | Female | 34  | $\geq 5$        | Singular     | Moderate              | No            | -3.49                  | 1.849                      |
| 27  | Male   | 42  | $< 5$           | Singular     | Poor                  | No            | -2.576                 | 2.596                      |
| 28  | Female | 57  | $\geq 5$        | Singular     | Moderate              | Yes           | -1.032                 | 3.417                      |
| 29  | Male   | 55  | $\geq 5$        | Multiple     | Moderate              | Yes           | 0.977                  | 1.21                       |
| 30  | Male   | 25  | $< 5$           | Singular     | Poor                  | Yes           | 1.25                   | -0.875                     |
| 31  | Male   | 51  | $< 5$           | Singular     | Poor                  | No            | -2.35                  | 4.59                       |
| 32  | Male   | 55  | $< 5$           | Singular     | Moderate              | Yes           | -0.826                 | 2.832                      |
| 33  | Female | 48  | $\geq 5$        | Singular     | Poor                  | Yes           | 1.796                  | -1.764                     |
| 34  | Male   | 39  | $\geq 5$        | Multiple     | Poor                  | Yes           | -2.392                 | 3.062                      |
| 35  | Male   | 52  | $< 5$           | Multiple     | Moderate              | No            | -0.755                 | 1.078                      |
| 36  | Male   | 50  | $< 5$           | Multiple     | Well                  | Yes           | -1.38                  | 2.14                       |
| 37  | Female | 33  | $< 5$           | Singular     | Poor                  | No            | 1.104                  | 0.878                      |
| 38  | Female | 62  | $< 5$           | Multiple     | Poor                  | Yes           | 2.41                   | -1.35                      |
| 39  | Male   | 67  | $\geq 5$        | Singular     | Moderate              | Yes           | -2.076                 | 3.041                      |

|    |        |    |    |          |          |     |        |        |
|----|--------|----|----|----------|----------|-----|--------|--------|
| 40 | Male   | 59 | ≥5 | Singular | Poor     | No  | -1.199 | 1.692  |
| 41 | Male   | 33 | <5 | Multiple | Poor     | Yes | -0.545 | 0.434  |
| 42 | Female | 43 | ≥5 | Singular | Poor     | No  | -3.179 | 1.75   |
| 43 | Female | 46 | <5 | Multiple | Well     | Yes | -0.458 | -2.074 |
| 44 | Female | 57 | <5 | Singular | Poor     | No  | 0.333  | -1.112 |
| 45 | Male   | 57 | <5 | Multiple | Moderate | No  | -4.12  | 3.669  |
| 46 | Male   | 64 | ≥5 | Singular | Poor     | No  | -2.093 | 4.192  |
| 47 | Male   | 38 | <5 | Multiple | Poor     | Yes | -1.17  | 2.37   |
| 48 | Female | 56 | ≥5 | Multiple | Moderate | No  | -0.595 | -1.32  |
| 49 | Male   | 39 | <5 | Multiple | Moderate | Yes | 0.278  | -2.042 |
| 50 | Female | 55 | ≥5 | Singular | Poor     | No  | -1.005 | 0.843  |

$\Delta\Delta Ct$ :  $\Delta Ct(N) - \Delta Ct(T)$ .  $\Delta Ct(N)$ : Ct value of  $\beta$ -actin or U6B was subtracted from Ct value of GAS5 or miR-135b in normal tissues.  $\Delta Ct(T)$ : Ct value of  $\beta$ -actin or U6B was subtracted from Ct value of GAS5 or miR-135b in paired HCC tissues.
